# Supplementary material for: Effect of cobalt addition on the corrosion behavior of near equiatomic NiTi shape memory alloy in normal saline solution: electrochemical and XPS studies
Source: Royal Society of Chemistry journal article supplement (doi:10.1039/c8ra02031k), 2018-01-01
Supplement: c8ra02031k1.pdf [file c8ra02031k1.pdf]

## Supporting Information

for

### Effect of Cobalt Addition on the Corrosion Behavior of Near Equiatomic NiTi Shape Memory Alloy in Normal Saline Solution: Electrochemical and XPS studies

Nawal D. Alqarni<sup>1</sup>, Joanna Wysocka<sup>2</sup>, N. El-Bagoury<sup>1,3</sup>, Jacek Ryl<sup>2</sup>, Mohammed A. Amin\*<sup>1,4</sup>,  
Rabah Boukherroub<sup>5</sup>

<sup>1</sup>Materials Science and Engineering Group, Department of Chemistry, Faculty of Science, Taif University, 888 Hawiya, Saudi Arabia.

<sup>2</sup>Department of Electrochemistry, Corrosion and Materials Engineering, Chemical Faculty, Gdansk University of Technology, Narutowicza 11/12, 80-233 Gdansk, Poland

<sup>3</sup>Central Metallurgical Research and Development Institute (CMRDI), P.O. Box: 87 Helwan, Cairo, Egypt

<sup>4</sup>Department of Chemistry, Faculty of Science, Ain Shams University, 11566 Abbassia, Cairo, Egypt

<sup>5</sup>Univ. Lille, CNRS, Centrale Lille, ISEN, Univ. Valenciennes, UMR 8520 - IEMN, F-59000 Lille, France

## I. Estimation of $\beta_a$ for passivation reaction (McCafferty method)

McCafferty in his valuable study entitled "Validation of corrosion rates measured by the Tafel extrapolation method" [1] demonstrated that to gain good results from the Tafel extrapolation, both the anodic and cathodic Tafel regions should be used instead of only one Tafel region.

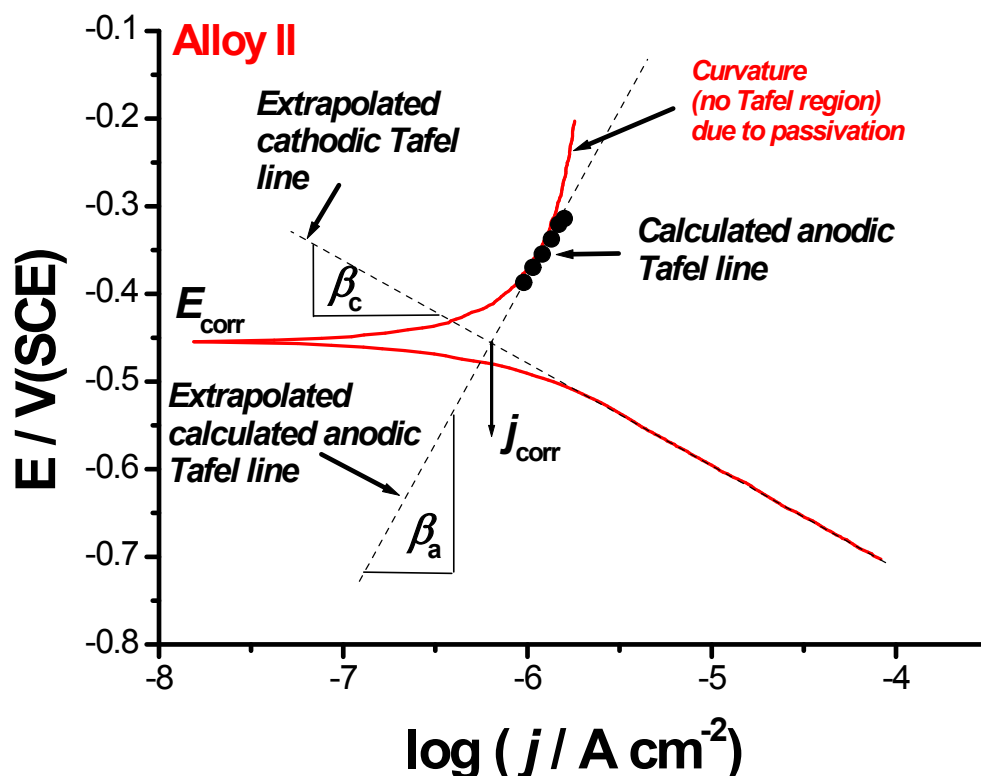

**Figure S1:** Analysis of Tafel regions for Alloy II to calculate the various electrochemical kinetic parameters associated with the polarization measurements presented in **Figure 3** (main manuscript).

However, the rate of corrosion can also be determined by Tafel extrapolation using either the cathodic or anodic polarization curve alone. McCafferty preferred the cathodic curve over the anodic one, as the former usually exhibits a longer, well-defined Tafel region. On the other hand, anodic polarization may deviate from the Tafel behavior exhibiting clear curvature, as noticed above, most probably due to passivation and dissolution. McCafferty reported that it is possible to calculate the anodic Tafel line from the experimental data (the recorded anodic polarization curve), as shown in **Figure S1** as a representative example for Alloy II. He postulated that extrapolation of the cathodic Tafel region back to zero overvoltage gives the net rate of the cathodic reaction at  $E_{\text{corr}}$ . This net rate of the cathodic reaction equals that of the anodic reaction at  $E_{\text{corr}}$ , see Eqs. (1) and (2) [1].

$$J_a \text{ (net experimental)} = j_a - |j_c| \quad (1)$$

$$j_a = J_a \text{ (net experimental)} + |j_c| \quad (2)$$

where  $j_a$  and  $|j_c|$  are the calculated anodic and the cathodic current densities, respectively. Thus,  $j_a$  is the sum of the experimentally observed anodic current density ( $J_a$ ) and the extrapolated cathodic current density,  $|j_c|$ .

The obtained Tafel slopes are depicted in Table S1.

**Table S1** – Average (standard deviation) values of  $\beta_c$  and  $\beta_a$  for the three tested SMAs; the latter estimated using McCafferty approach [1]. Polarization measurements were conducted in 0.9% NaCl solution at a scan rate of 1.0 mV s<sup>-1</sup> at 37 °C

| <b>Tested alloy</b>        | <b><math>\beta_c /</math><br/>mV dec<sup>-1</sup></b> | <b><math>\beta_a /</math><br/>mV dec<sup>-1</sup></b> |
|----------------------------|-------------------------------------------------------|-------------------------------------------------------|
| <b>Alloy I (0.0% Co)</b>   | -450(5)                                               | 716(8)                                                |
| <b>Alloy II (1.5% Co)</b>  | -118(2)                                               | 380(4)                                                |
| <b>Alloy III (4.0% Co)</b> | -214(3)                                               | 556(5)                                                |

## II. DEIS supporting data

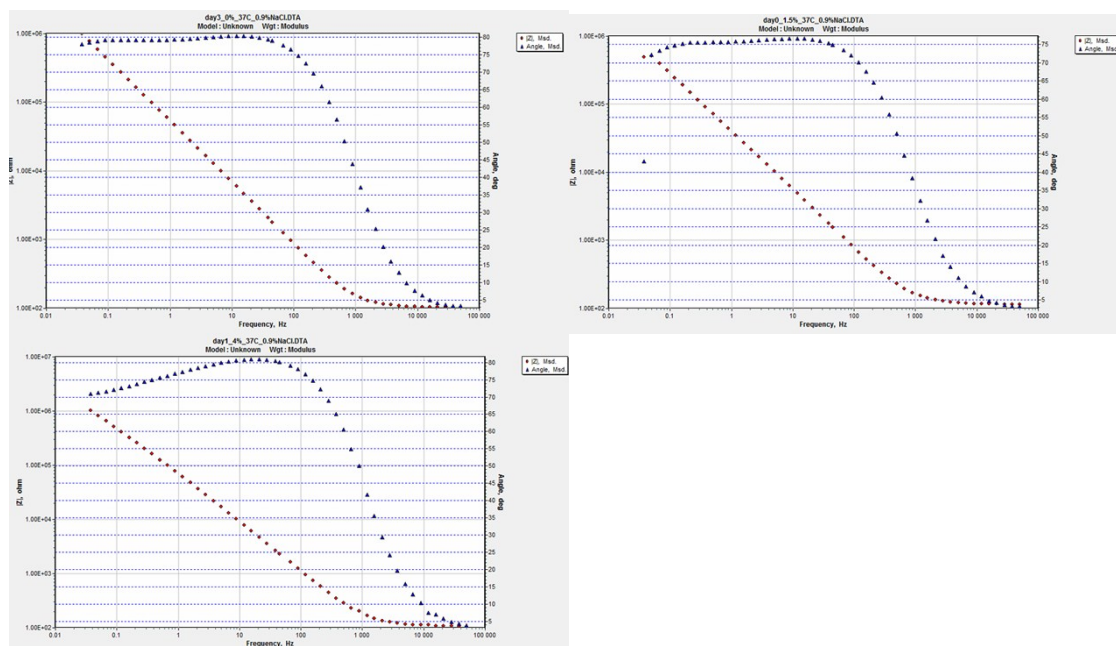

**Figure S2:** Bode plots measured for day 2: top left - Alloy I, top right - Alloy II, bottom left - Alloy III

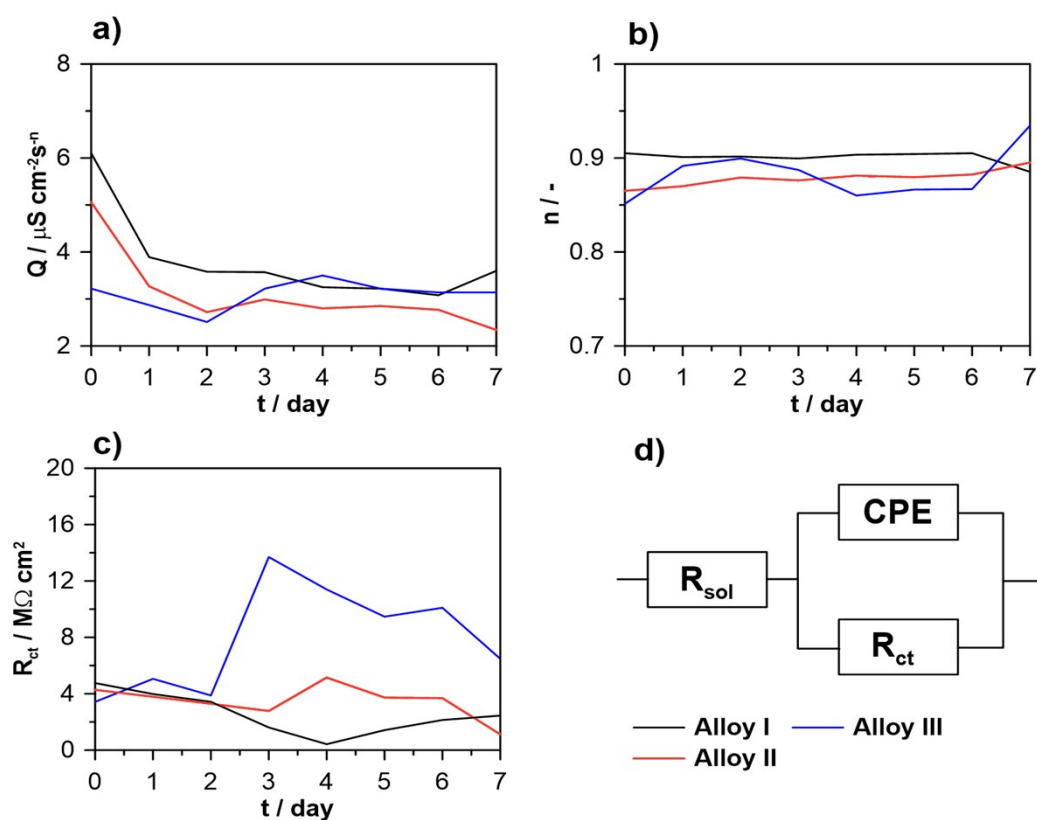

**Figure S3:** a-c) Variation of electric parameters CPE ( $Q$ ,  $n$ ) and  $R_{ct}$  obtained from fitting procedure using equivalent circuit shown on Fig 6d).

## II. Supporting SEM and EDX analyses

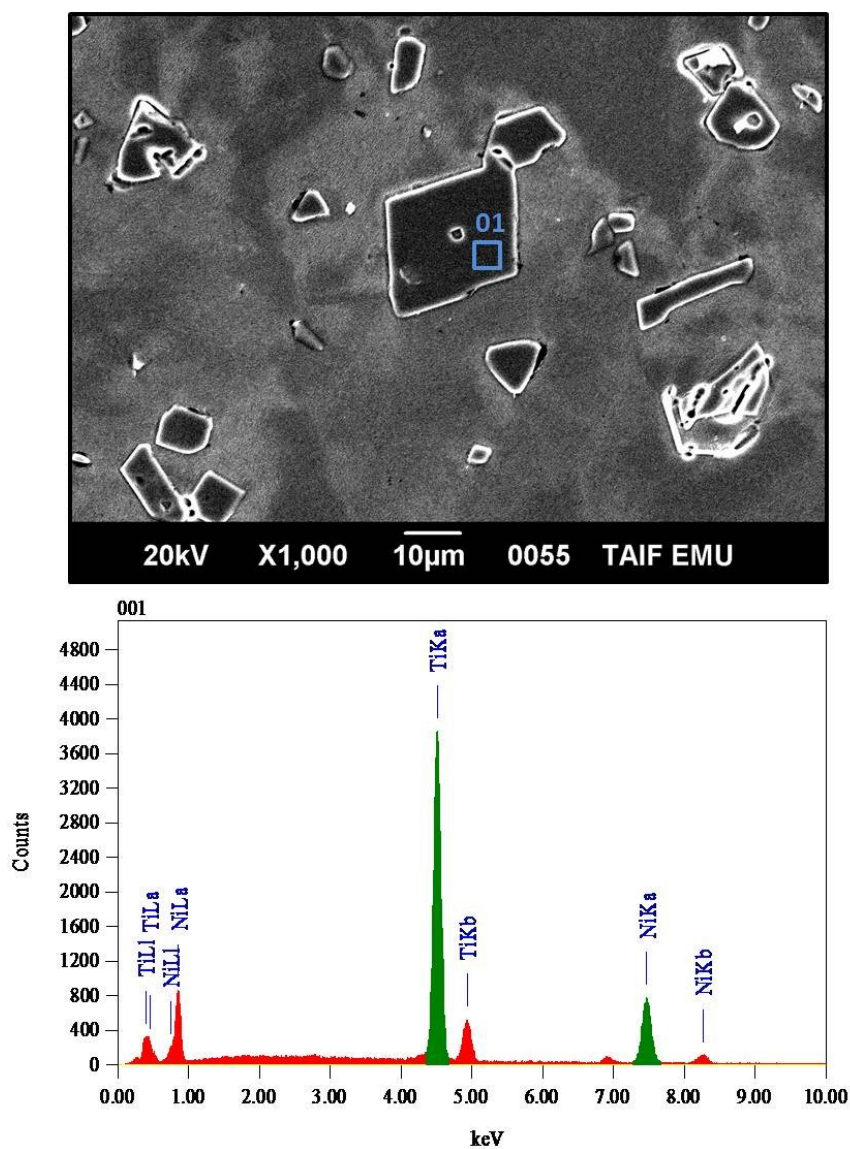

**Figure S4:** SEM image and EDX spectrum of  $\text{Ti}_2\text{Ni}$  phase in the  $\text{TiNiCo}$  (0 at% Co) SMA.

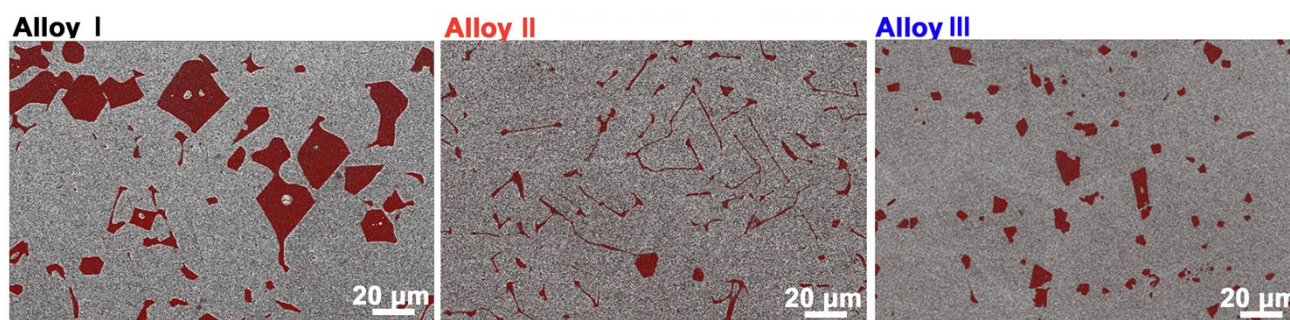

**Figure S5:** SEM analysis of the studied alloys (as-polished) as a function of Co content. Alloy I: 0.0% Co; Alloy II: 1.5% Co, Alloy III: 4.0% Co.

EDX analysis was performed using energy-dispersive X-Ray spectroscopy (EDX) technique. EDX analysis was performed before and after 7 days exposure in 0.9% NaCl at 37 °C both for alloy matrix and within the dark phases visible on SEM micrographs. Its goal was to investigate the influence of microstructure on localized corrosion of shape-memory alloys.

The dark phases show the stoichiometry of  $Ti_2Ni$ . Here, the contribution from cobalt originates from matrix beneath the  $Ti_2Ni$  phase (due to few micron in-depth coverage of EDX). Its contribution in analyzed spectra decreases with decreasing the accelerating voltage.

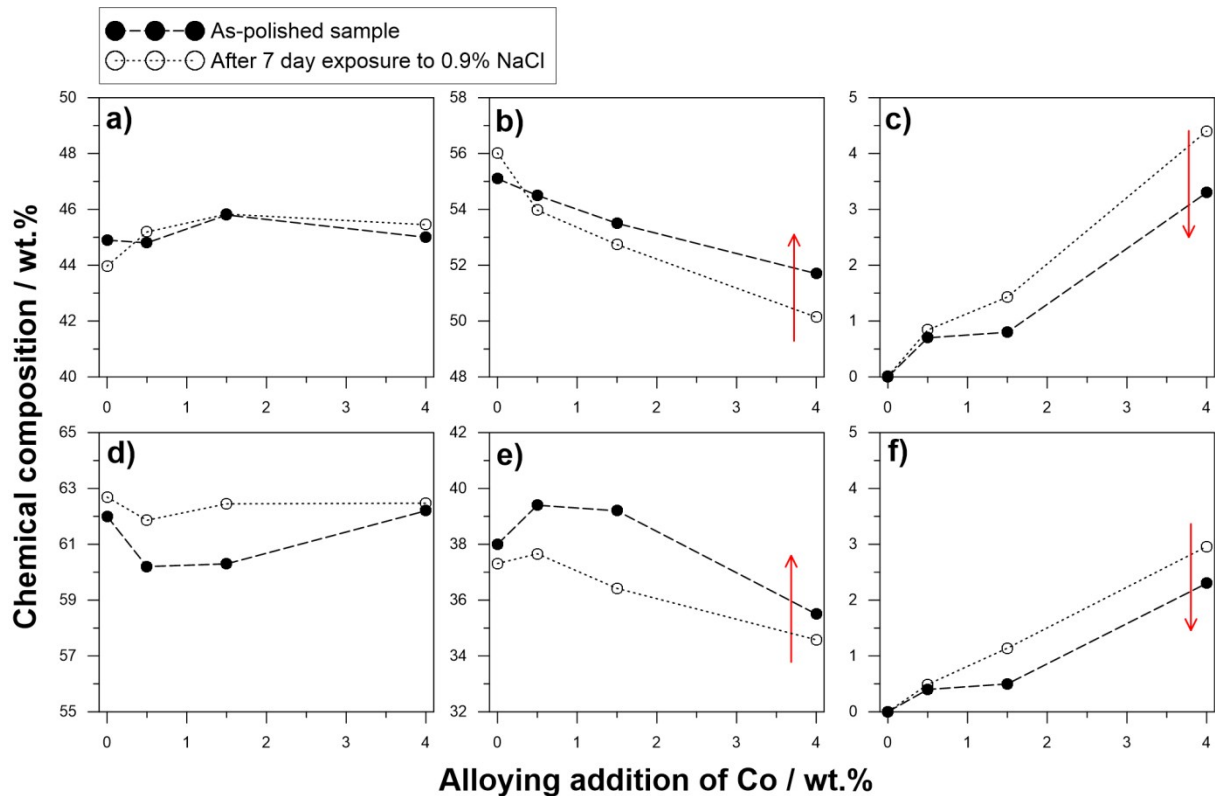

**Figure S6:** Changes in amount of a) titanium, b) nickel and c) cobalt in alloy matrix as a result of exposition to 0.9% NaCl solution at temperature of 37 °C. d-e) show analogous analyses carried out in the region of  $Ti_2Ni$  phase.

As a result of sample exposition to 0.9% NaCl solution at 37 °C, the amount of nickel decreases for each investigated sample. Surprisingly, the same behavior was registered within the  $Ti_2Ni$  phase, revealing no new information behind worse corrosion resistance of the NiTi SMA containing 0.5% Co. Here, the contribution from cobalt originates from matrix beneath the  $Ti_2Ni$  phase (due to few micron in-depth coverage of EDX).

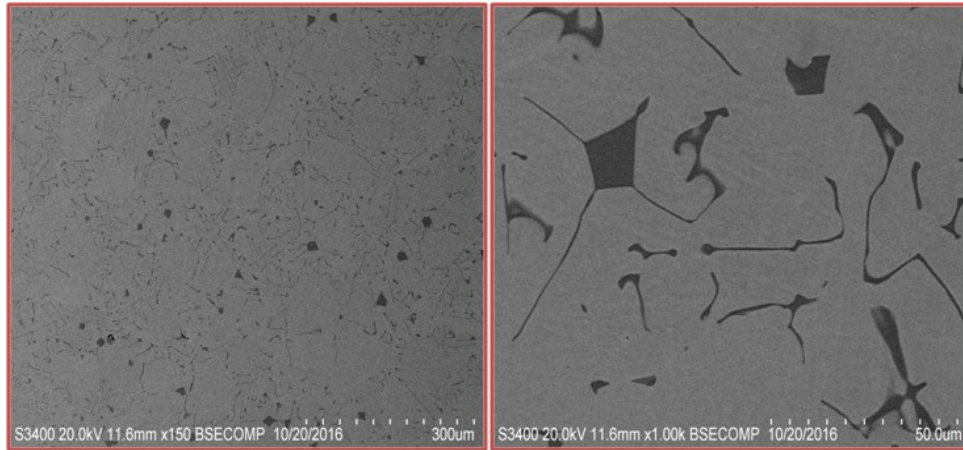

**Figure S7:** SEM analysis of the studied alloys after 7 days immersion in 0.9% NaCl at 37 °C as a function of Co content. Alloy I: 0.0% Co, Alloy II: 1.5% Co, Alloy III: 4.0% Co.

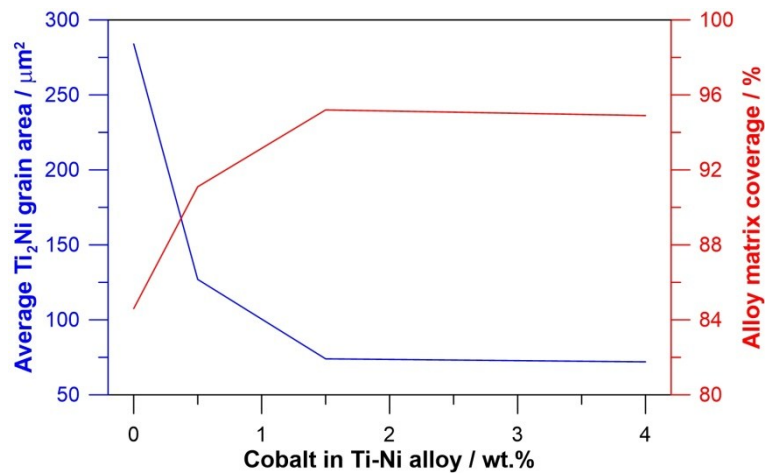

**Figure S8:** Variation of average grain area of the  $Ti_2Ni$  phase and matrix's surface area with Co content in the NiTi SMA. Data calculated via processing the images in Fig. 7 using Gwyddion software

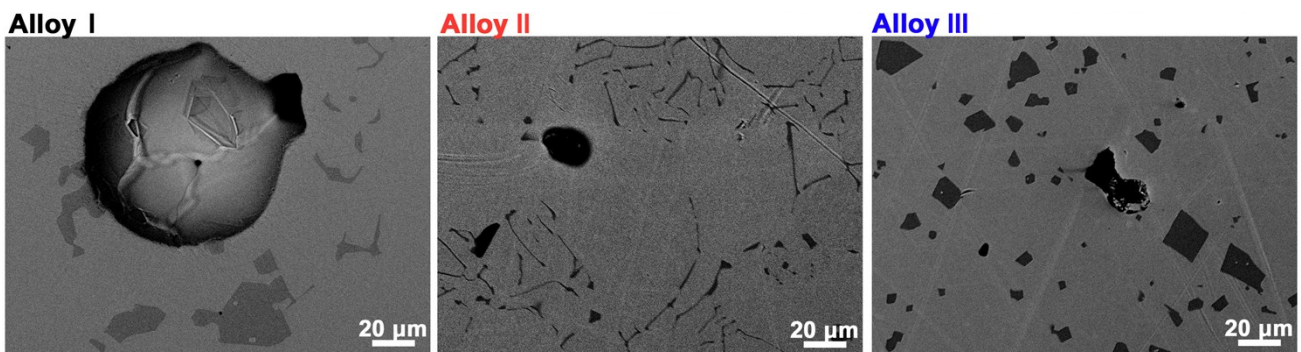

**Figure S9:** SEM analysis of the studied alloys after 7 days immersion in 0.9% NaCl at 37 °C as a function of Co content. Alloy I: 0.0% Co, Alloy II: 1.5% Co, Alloy III: 4.0% Co.

## References

- [1] E. McCafferty, Validation of corrosion rates measured by the Tafel extrapolation method  
Corros. Sci. 47 (2005) 3202 - 3215.
